# Supplementary material
Source: PubMed Central journal article supplement (PMC2903671)
Supplement: E10-01-0080_1.pdf [file E10-01-0080_1.pdf]

1 FIGURE LEGENDS SUPPLEMENTARY DATA

2 **Figure S1.** *Halo assay with catalytic active and inactive Ste24* - Different *MATa* cells (wild-  
3 *type*, *ste24Δ*, *rce1Δ*, *ste24Δ rce1Δ*, *ste24Δ rce1Δ pRS415ste24*, *ste24Δrce1Δ*,  
4 *pRS415ste24<sup>E296G</sup>*, *ste24Δ rce1Δ pJJH71-ZMPSTE24* and *ste24Δ rce1Δ pJJH71-TcSTE24*)  
5 were grown overnight in liquid YPD medium and adjusted to a final concentration of  $5 \times 10^9$   
6 cells/ml. Then, 1,5  $\mu$ l of each suspension was spotted onto YPD media at 42°C containing  
7 0.04% Triton X-100 and  $2 \times 10^6$  cells of the *MATa sst2Δ* strain cells. Cells were incubated at  
8 30°C for 3 days. Grayscale images were inverted for a better visualization of the halos.

9 **Figure S2.** *Immunoblot detecting Chs3-13Myc in transformed wild-type and ste24Δ cell*  
10 *extracts*. Total cellular extracts obtained from wild-type (WT) and *ste24Δ* cells expressing  
11 Chs3-13Myc from centromeric plasmids were subjected to SDS-PAGE and subsequently  
12 blotted onto nitrocellulose membranes for immunostaining with anti-cMyc antibodies.  
13 Standard proteins are indicated with molecular masses given in kDa. MC, mock control using  
14 wild-type yeast cell transformed with the empty pRS415 vector.

15

16

**WT**

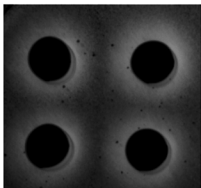

***rce1*Δ**

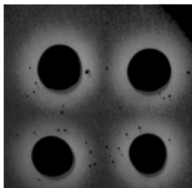

***rce1*Δ *ste24*Δ  
*STE24***

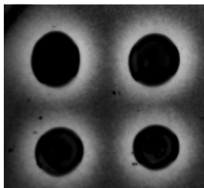

***rce1*Δ *ste24*Δ  
*STE24*<sup>E296G</sup>**

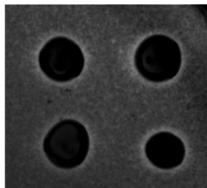

***ste24*Δ**

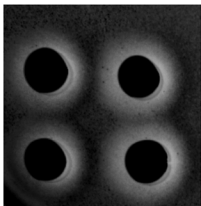

***rce1*Δ *ste24*Δ**

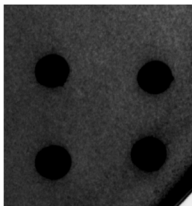

***rce1*Δ *ste24*Δ  
*TcSTE24***

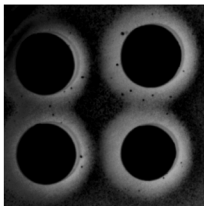

***rce1*Δ *ste24*Δ  
*ZMPSTE24***

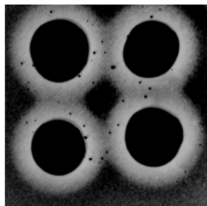

**KDa**

**WT**

***ste24*Δ**

**MC**

**170** —

**130** —

**100** —

**70** —

**55** —

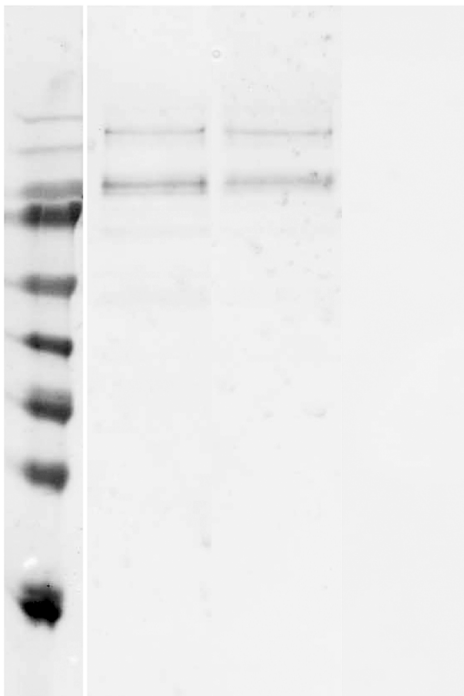

Table S1. Oligonucleotide primers

| Primer                                       | Sequence 5' →3'                                                        | Amplified sequence                   |
|----------------------------------------------|------------------------------------------------------------------------|--------------------------------------|
| <i>Primer for amplifying different cDNAs</i> |                                                                        |                                      |
| chs3pro( <i>KpnI</i> )-F                     | TACTCAGGTACCAAAAACGCGTTATTGGCGCTGG                                     | <i>chs3</i> and <i>chs3</i> promoter |
| chs3( <i>SacII</i> )-R                       | TACTCACCGCGGTGCAACGAAGGAGTCACTTTC                                      | <i>chs3</i> without stop codon       |
| chs3( <i>EcoRI</i> )-R                       | TACTCAGAATTCAAACGCGTTATTGGCGCTGG                                       | <i>chs3</i>                          |
| 13Myc( <i>SacII</i> )-F                      | TACTCACCGCGGCCCGGGTTAATTAACGGT                                         | 13Myc tag                            |
| 13Myc( <i>SacI</i> )-R                       | TACTCAGAGCTCTTCACTAGTGATTGATAAATT                                      | 13Myc tag                            |
| GALpro( <i>KpnI</i> )-F                      | TACTCAGGTACCAGATCTGTAAAGAGCCCCATT                                      | GAL1 promoter                        |
| GALpro_ATG_Flag( <i>Sall</i> )-R             | TACTCAGTCGACCTTGTCGTCATCGTCTTT<br>GTAGTCAGACATTTTGGAGATCCGGGTT         | GAL1 promoter                        |
| GFP( <i>SacII</i> )-F                        | TACTCACCGCGGCGGATCCCCGGGTAAATTA                                        | <i>gfp</i>                           |
| GFP( <i>SacI</i> )-R                         | TACTCAGAGCTCTATTCTGGGCCTCCATGTCCG                                      | <i>gfp</i>                           |
| ste24-F                                      | TACTCAGTCGACTTTGATCTTAAGACGATTCTC                                      | <i>ste24</i>                         |
| ste24-R                                      | TACTCACCGCGGTTAGTTTTTCTTCTTTTCACT                                      | <i>ste24</i>                         |
| ste24-F( <i>BamHI</i> )                      | TACTCAGGATCCATGTTTGATCTTAAGACGATT                                      | <i>ste24</i>                         |
| ste24_9His-R( <i>SpeI</i> )                  | TACTCAGCATGCCTAGTGGTGGTGGTGGTGGTGG<br>TGGTGGTGGTTTTTCTTCTTTTCACT       | <i>ste24</i>                         |
| Zmpste24( <i>BamHI</i> )-F                   | TACTCAGGATCCATGGGGATGTGGGCATCGCTG                                      | <i>Zmpste24</i>                      |
| Zmpste24( <i>SphI</i> )-R                    | TACTCAGCATGCTCAGTGTGCTTCATAGTTTT                                       | <i>Zmpste24</i>                      |
| Tcste24( <i>BamHI</i> )-F                    | TACTCAGGATCCATGATCACCTTAAACGAGGTT                                      | <i>Tc_ste24</i>                      |
| TcSTE24( <i>SphI</i> )-R                     | TACTCAGCATGCTTAGTCCTTCTTCTGCAGTGC                                      | <i>Tc_ste24</i>                      |
| <i>Primer for homologous recombination</i>   |                                                                        |                                      |
| chs4 <sup>C693S</sup> -F                     | AGAAGGATAAACAAGGTAAAAAAAAAAAAAGA<br>CTCTGTAATTATGTAGGGCGCGCCAC TTCTAAA | <i>chs4</i> <sup>C693S</sup>         |
| chs4 <sup>C693S</sup> -R                     | GTGTAAACTGTTGCACCTATAAAGAATGAAAAC<br>AATCTAGCCGCATAGGCCACTAGTGGATCTG   | <i>chs4</i> <sup>C693S</sup>         |
| <i>Primer for site directed mutagenesis</i>  |                                                                        |                                      |
| ste24 <sup>E269G</sup> -F                    | CGGCTGTTTTGGCCCATGGAATCGGTCACTGGC                                      | <i>ste24</i> <sup>E269G</sup>        |
| ste24 <sup>E269G</sup> -R                    | GCCAGTGACCGATTCCATGGGCCAAAACAGCCG                                      | <i>ste24</i> <sup>E269G</sup>        |
| <i>Primer for yeast two-hybrid analyses</i>  |                                                                        |                                      |
| chs3-C1 ( <i>EcoRI</i> )-F                   | TAGTCAGAATTCATGACCGGCTTGAATGGAGAT                                      | <i>chs3</i> -C1 (aa 1-165)           |
| chs3-C1 ( <i>BamHI</i> )-R                   | TACTCAGGATCCTGTATCATTTCGTTTCTTCT                                       | <i>chs3</i> -C1 (aa 1-165)           |
| chs3-C3 ( <i>EcoRI</i> )-F                   | TAGTCAGAATTCACCGTTTGTAGTAGTTCGAAA                                      | <i>chs3</i> -C3 (aa 226-452)         |
| chs3-C3 ( <i>BamHI</i> )-R                   | TAGTCAGGATCCATCAGAGGCAATACAACCGAC                                      | <i>chs3</i> -C3 (aa 226-452)         |
| chs3-C4 ( <i>EcoRI</i> )-F                   | TAGTCAGAATTCGTTGGACTGTAGCTAGGAAA                                       | <i>chs3</i> -C4 (aa 476-1000)        |
| chs3-C4 ( <i>BamHI</i> )-R                   | TAGTCAGGATCCCGTAGAATTAATCCATCTTCG                                      | <i>chs3</i> -C4 (aa 476-1000)        |
| chs3-C7 ( <i>EcoRI</i> )-F                   | TAGTCAGAATTCAAATTTGATGACTTCTCATGG                                      | <i>chs3</i> -C7 (aa 1109-1165)       |
| chs3-C7 ( <i>BamHI</i> )-R                   | TAGTCAGGATCCTGCAACGAAGGAGTCACTTTC                                      | <i>chs3</i> -C7 (aa 1109-1165)       |
| ste24-S2 ( <i>EcoRI</i> )-F                  | TAGTCAGAATTCAGACAGTACCAGAAGCTATCT                                      | <i>ste24</i> -S2 (aa 36-95)          |
| ste24-S2 ( <i>BamHI</i> )-R                  | TACTCAGGATCCTTTAGGGAAGAGGTCGTATTT                                      | <i>ste24</i> -S2 (aa 36-95)          |
| ste24-S6 ( <i>EcoRI</i> )-F                  | TAGTCAGAATTCCTTAATAAGTTCACTCCATTG                                      | <i>ste24</i> -S6 (aa 221-304)        |
| ste24-S6 ( <i>BamHI</i> )-R                  | TACTCAGGATCCTTTTTGCCAGTGACCGATTTTC                                     | <i>ste24</i> -S6 (aa 221-304)        |
| ste24-S8 ( <i>EcoRI</i> )-F                  | TAGTCAGAATTCAGTTTAATTTCCAGAACTCAT                                      | <i>ste24</i> -S8 (aa 384-453)        |
| ste24-S8 ( <i>BamHI</i> )-R                  | TACTCAGGATCCGTTTTTCTTCTTTTCACTAAC                                      | <i>ste24</i> -S8 (aa 384-453)        |

Table S2. Plasmids

| <b>Plasmid</b>                        | <b>Description</b>                                                  | <b>Source/reference</b>                 |
|---------------------------------------|---------------------------------------------------------------------|-----------------------------------------|
| pAG503                                | centromeric, G418 resistance                                        | Laboratory collection                   |
| pAG503 <i>CHS3</i>                    | Chs3 under endogenous promoter control                              | This study                              |
| pAG503 <i>GAL-STE24</i> ↑             | Ste24 under Gal1 promoter control                                   | This study                              |
| pRS415                                | centromeric, <i>Leu2</i>                                            | Stillman D. J.                          |
| pRS415ste24                           | Ste24, endogenous promoter                                          | This study                              |
| pRS415ste24 <sup>E269G</sup>          | Ste24 <sup>E269G</sup> , endogenous promoter                        | This study                              |
| pRS415 <i>CHS3</i>                    | Chs3, endogenous promoter control                                   | This study                              |
| pRS415 <i>CHS3</i> Myc                | Chs3, endogenous promoter, C-terminal 13Myc-tag                     | This study                              |
| pGREG576                              | centromeric, G418 resistance, <i>Ura3</i> , Gal promoter, GFP       | Euroscarf (Jansen <i>et al.</i> , 2005) |
| pGREG576 <i>CHS4</i>                  | Chs4, Gal promoter, N-terminal GFP                                  | This study                              |
| pGREG576 <i>CHS4</i> <sup>C693S</sup> | Chs4 <sup>C693S</sup> , Gal promoter, N-terminal GFP                | This study                              |
| pJJH71                                | 2μ, <i>PFK2</i> promoter, <i>Ura3</i>                               | (Raben <i>et al.</i> , 1995)            |
| pJJH71 ScSTE24                        | STE24, <i>PFK2</i> promoter                                         | This study                              |
| pJJH71 ZMPSTE24                       | ZMPSTE24, <i>PFK2</i> promoter                                      | This study                              |
| pJJH71 TcSTE24                        | TcSTE24, <i>PFK2</i> promoter                                       | This study                              |
| pFA6a-GFP(S65T)-KanMX4                | G418 for homologous recombination                                   | Laboratory collection                   |
| pGADT7                                | Bait vector, Amp <sup>r</sup> , <i>LEU2</i> , DNA-activation domain | Clontech                                |
| pGAD-C1                               | Bait vector, chs3 aa 1-165 (C1)                                     | This study                              |
| pGAD-C3                               | Bait vector, chs3 aa 226-452 (C3)                                   | This study                              |
| pGAD-C4                               | Bait vector, chs3 aa 476-1000 (C4)                                  | This study                              |
| pGAD-C7                               | Bait vector, chs3 aa 1109-1165 (C7)                                 | This study                              |
| pGAD-S2                               | Bait vector, ste24 aa 36-95 (S2)                                    | This study                              |
| pGAD-S6                               | Bait vector, ste24 aa 221-304 (S6)                                  | This study                              |
| pGAD-S8                               | Bait vector, ste24 aa 384-453 (S8)                                  | This study                              |
| pGBRT7                                | Prey vector, Kan <sup>r</sup> , <i>TRP1</i> , DNA-binding domain    | Clontech                                |
| pGBR-C1                               | Prey vector, chs3 aa 1-165 (C1)                                     | This study                              |
| pGBR-C3                               | Prey vector, chs3 aa 226-452 (C3)                                   | This study                              |
| pGBR-C4                               | Prey vector, chs3 aa 476-1000 (C4)                                  | This study                              |
| pGBR-C7                               | Prey vector, chs3 aa 1109-1165 (C7)                                 | This study                              |
| pGBR-S2                               | Prey vector, ste24 aa 36-95 (S2)                                    | This study                              |
| pGBR-S6                               | Prey vector, ste24 aa 221-304 (S6)                                  | This study                              |
| pGBR-S8                               | Prey vector, ste24 aa 384-453 (S8)                                  | This study                              |
